# Supplementary material
Source: PubMed Central journal article supplement (PMC4752393)
Supplement: NIHMS756111-supplement-Supporting_Information.pdf [file NIHMS756111-supplement-Supporting_Information.pdf]

# Utility of 5-Cyanotryptophan Fluorescence as a Sensitive Probe of Protein Hydration

Beatrice N. Markiewicz,<sup>1,‡</sup> Debopreeti Mukherjee,<sup>1,‡</sup> Thomas Troxler<sup>1,2,\*</sup>, and Feng Gai<sup>1,2,\*</sup>

<sup>1</sup>Department of Chemistry and <sup>2</sup>The Ultrafast Optical Processes Laboratory, University of Pennsylvania, Philadelphia, PA 19104

## Supporting Information

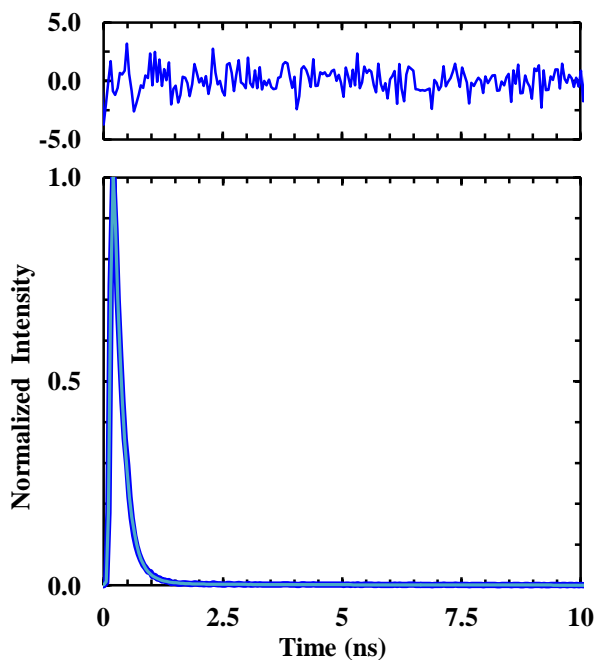

**Figure S1.** Fluorescence decay kinetics of 5CI in D<sub>2</sub>O. The smooth line is a fit to a double-exponential function. The residuals of the fits are shown in the top panel and the resulting fitting parameters are listed in Table 1.

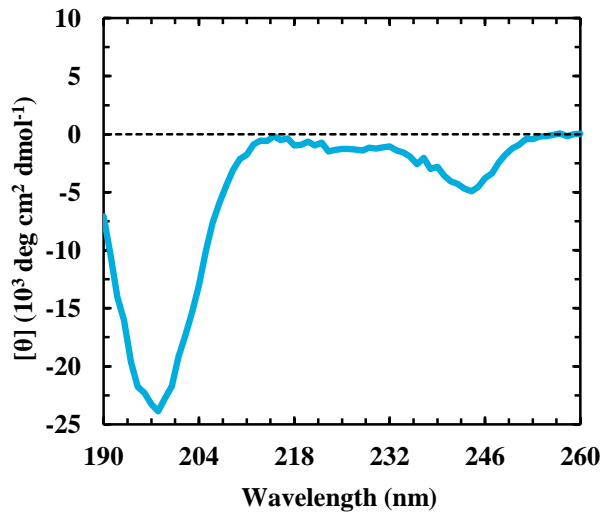

**Figure S2.** CD spectrum of  $2W_{\text{CN}P}$  in  $\text{H}_2\text{O}$  at  $1.0\text{ }^\circ\text{C}$ .

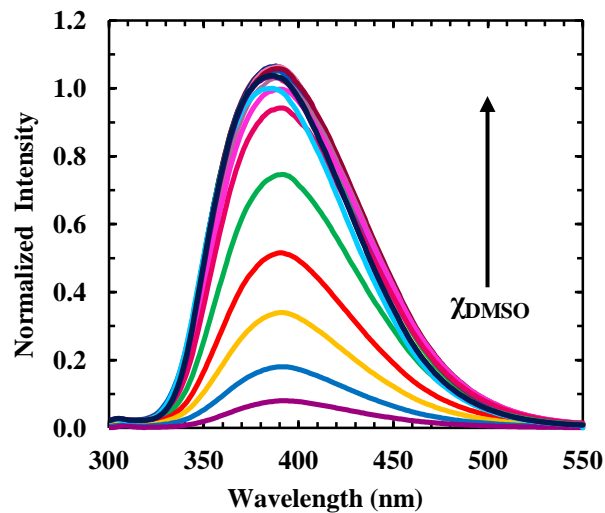

**Figure S3.** Fluorescence spectra of  $2W_{\text{CN}P}$  in DMSO- $\text{H}_2\text{O}$  mixtures with different molar fractions of DMSO ( $\chi_{\text{DMSO}}$ ).

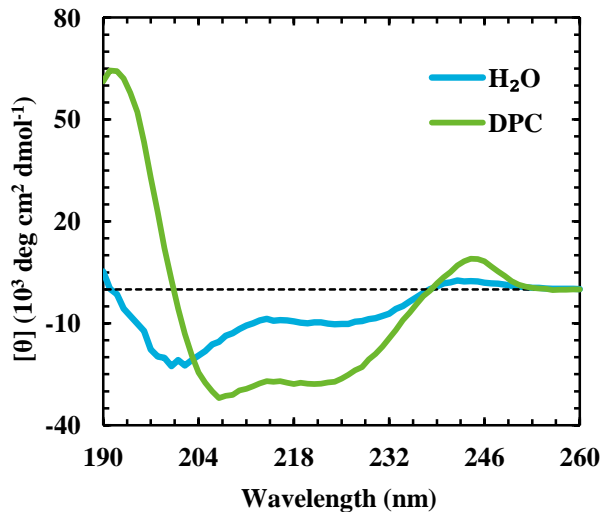

**Figure S4.** CD spectra of MPXW<sub>CN</sub> in H<sub>2</sub>O and in DPC micelles at 25.0 °C, as indicated.

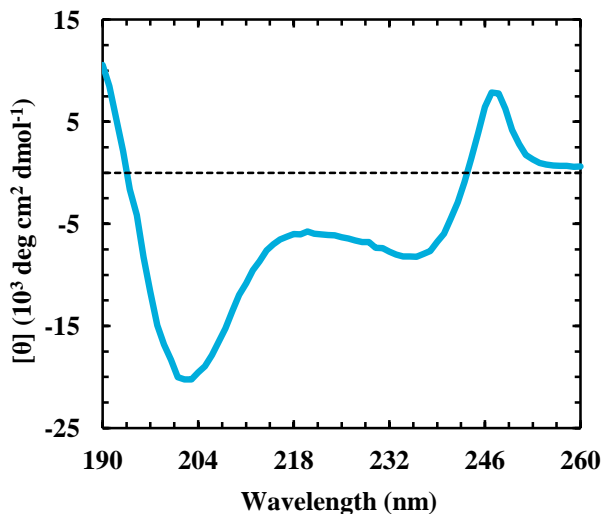

**Figure S5.** Far UV CD spectrum of TC2W<sub>CN</sub> in H<sub>2</sub>O at 1.0 °C. The strong CD couplet at 247 and 236 nm, arising from the exciton coupling between the two Trp<sub>CN</sub> sidechains, indicates that the peptide is folded. It is worth noting that the Trp<sub>CN</sub>–Trp<sub>CN</sub> exciton CD band is different from that of Trp–Trp and hence, can be used as a stand-alone structure reporter. We are currently exploring this potential application and will report the findings in a future publication.
